# Supplementary material for: Seasonal Aerosol Acidity, Liquid Water Content and Their Impact on Fine Urban Aerosol in SE Canada
Source: MDPI journal article supplement (doi:10.3390/atmos13071012), 2022-06-23
Supplement: s1 [file s1]

# Supplementary Materials: Seasonal aerosol acidity, liquid water content and its impacts on fine urban aerosol in SE Canada

Andrea M. Arangio<sup>\*1</sup>, Pourya Shahpoury<sup>2,3</sup>, Ewa Dabek-Zlotorzynska<sup>4</sup> and Athanasios Nenes<sup>\*1,5</sup>

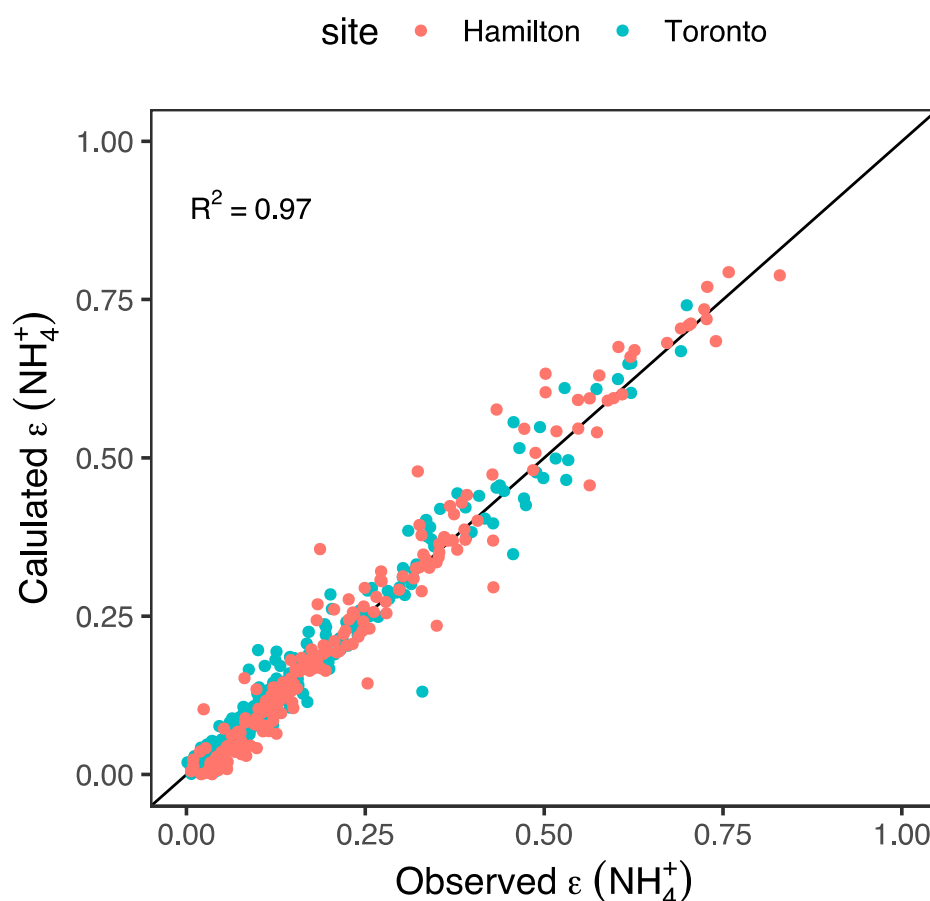

**Figure S1.** Validation of pH values calculated through ISORROPIA for Hamilton (coral) and Toronto (light blue). The validation compares the calculated and the measured gas-particle partitioning of  $\text{NH}_3$ . The plot indicates that the model values are consistent with the observed data being the  $R^2 = 0.97$ .
